# Supplementary material for: Metabolic Phenotyping of Adipose-Derived Stem Cells Reveals a Unique Signature and Intrinsic Differences between Fat Pads
Source: Hindawi journal article supplement (doi:10.1155/2019/9323864), 2019-05-15

## Figure S1

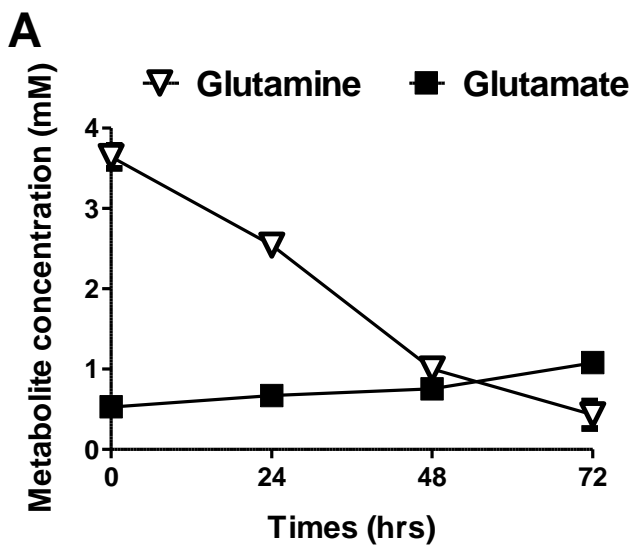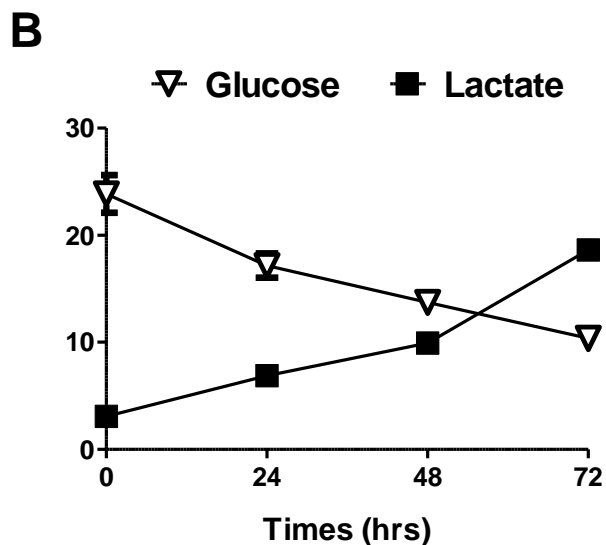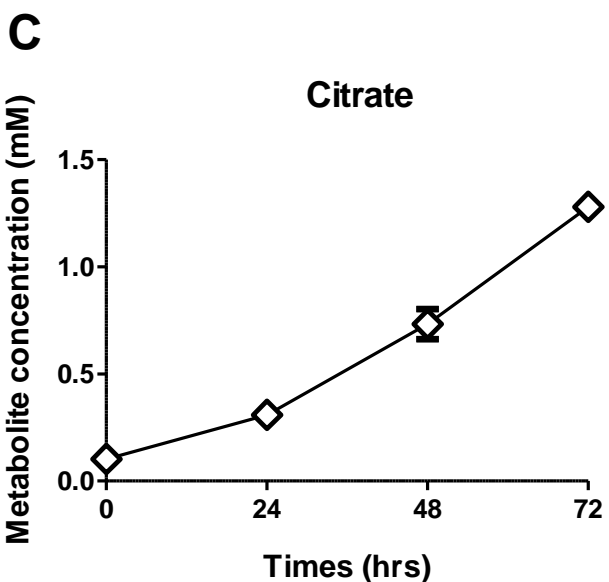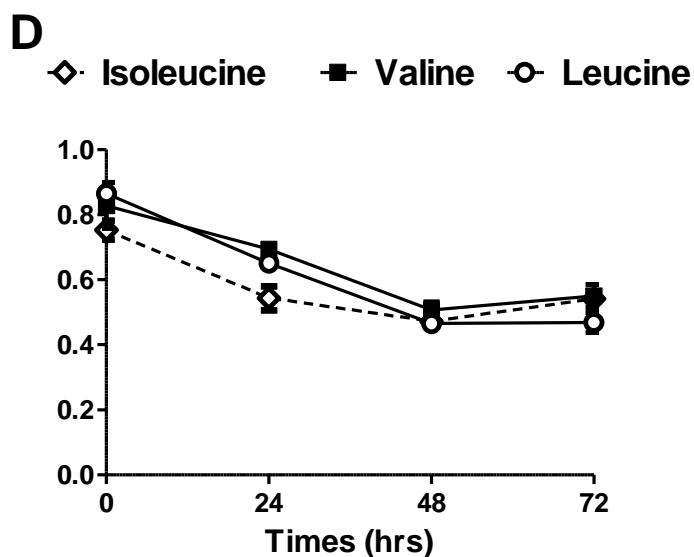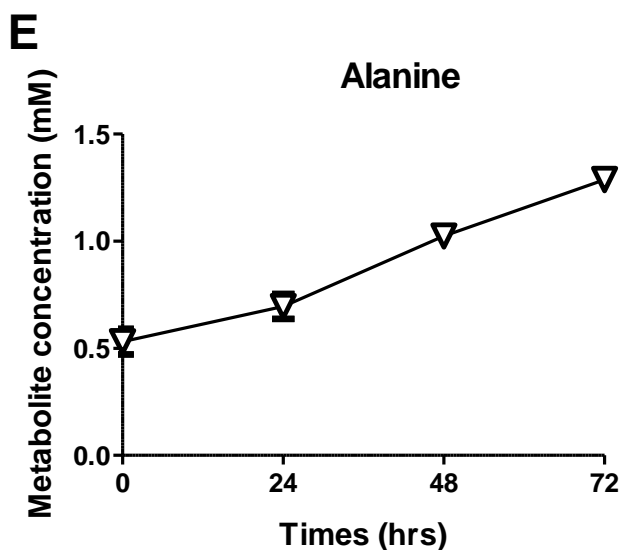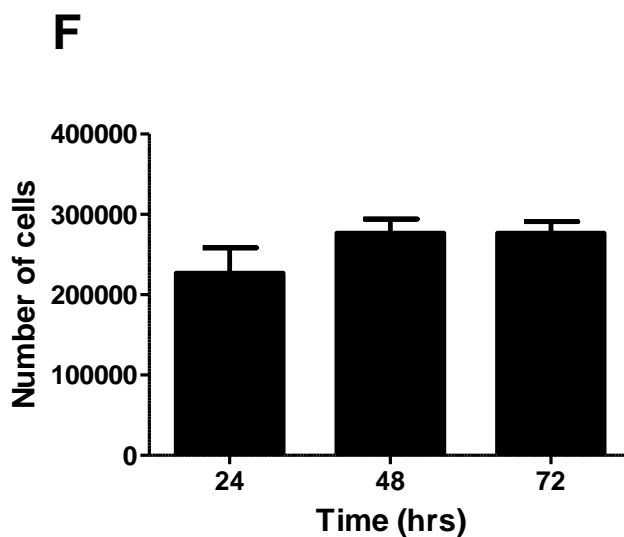

Supplement: f1 [file 9323864.f1.pdf]
