# Supplementary material for: Metabolic Phenotyping of Adipose-Derived Stem Cells Reveals a Unique Signature and Intrinsic Differences between Fat Pads
Source: Hindawi journal article supplement (doi:10.1155/2019/9323864), 2019-05-15
Supplement: f2 [file 9323864.f2.pdf]

| Concentration (in mM) | Cell number | 2-Hydroxybutyrate | 2-Oxoglutarate | 3-Hydroxybutyrate | Acetate | Alanine       | Arginine | Citrate          | Formate       | Fructose | Fumarate | Glucose           | Glutamate     | Glutamine     | Glycine       | Histidine     | Isoleucine    | Lactate           | Leucine       | Lysine | Malate        | Methionine    | Niacinamide   | Phenylalanine | Pyroglutamate | Pyruvate           | Serine        | Succinate | Threonine    | Tryptophan    | Tyrosine      | Valine        |
|-----------------------|-------------|-------------------|----------------|-------------------|---------|---------------|----------|------------------|---------------|----------|----------|-------------------|---------------|---------------|---------------|---------------|---------------|-------------------|---------------|--------|---------------|---------------|---------------|---------------|---------------|--------------------|---------------|-----------|--------------|---------------|---------------|---------------|
| SAT ASC # 1           | 240 000     | -0.027            | 0.061          | 0.151             | -0.050  | 1.148         | -0.374   | 1.851            | 0.334         | -0.368   | 0.007    | -7.415            | 0.508         | -1.689        | 0.412         | -0.071        | -0.171        | 19.395            | -0.552        | 0.291  | 0.177         | 0.084         | -0.029        | -0.009        | -0.167        | -0.075             | -1.136        | 0.013     | -0.461       | -0.035        | -0.087        | -0.287        |
| SAT ASC # 2           | 260 000     | -0.240            | 0.129          | 0.126             | -0.110  | 0.982         | -0.210   | 1.594            | 0.309         | 0.002    | 0.007    | -11.124           | 0.493         | -1.721        | 0.456         | -0.102        | -0.349        | 18.259            | -1.039        | -0.304 | 0.064         | 0.019         | -0.029        | -0.077        | -0.252        | -0.107             | -0.731        | -0.021    | -0.402       | -0.036        | -0.050        | -0.412        |
| SAT ASC # 3           | 180 000     | -0.008            | 0.132          | 0.103             | -0.034  | 1.669         | -0.342   | 2.168            | 0.383         | 0.525    | 0.008    | -7.503            | 0.513         | -2.824        | 0.751         | -0.118        | -0.254        | 22.050            | -0.544        | 0.164  | -0.158        | 0.158         | -0.032        | -0.098        | -0.208        | -0.013             | -0.299        | 0.032     | -0.230       | -0.035        | 0.019         | -0.047        |
| SAT ASC # 4           | 200 000     | -0.018            | 0.094          | -0.066            | -0.066  | 1.049         | -0.603   | 1.798            | 0.317         | 0.150    | 0.009    | -10.068           | 0.510         | -2.749        | 0.433         | -0.084        | -0.395        | 19.972            | -0.494        | -0.117 | 0.187         | 0.055         | -0.026        | -0.006        | -0.211        | -0.069             | -0.614        | 0.007     | -0.318       | -0.035        | -0.113        | -0.245        |
| SAT ASC # 5           | 180 000     | -0.013            | -0.088         | 0.050             | -0.144  | 0.820         | 0.333    | 1.589            | 0.246         | 0.060    | 0.006    | -10.468           | 0.533         | -1.905        | 0.289         | -0.113        | -0.452        | 17.635            | -0.535        | 0.080  | 0.221         | 0.045         | -0.030        | -0.067        | -0.029        | -0.121             | -0.596        | -0.047    | -0.535       | -0.033        | -0.134        | -0.400        |
| SAT ASC # 6           | 200 000     | 0.003             | -0.089         | 0.167             | -0.034  | 1.034         | -0.065   | 1.780            | 0.303         | -0.031   | 0.009    | -6.752            | 0.535         | -1.478        | 0.782         | -0.056        | -0.083        | 18.462            | -0.337        | 0.596  | 0.289         | 0.107         | -0.021        | 0.027         | 0.004         | -0.098             | -0.637        | 0.030     | -0.135       | -0.033        | -0.001        | -0.200        |
| VAT ASC # 1           | 140 000     | 0.029             | -0.089         | 0.044             | -0.081  | 1.074         | 0.090    | 1.391            | 0.468         | 0.075    | 0.011    | -22.501           | 0.568         | -2.744        | 0.460         | -0.150        | -0.508        | 45.844            | -0.695        | -0.006 | 0.140         | -0.017        | -0.036        | -0.155        | -0.168        | -0.543             | -0.902        | 0.051     | -0.179       | -0.047        | -0.107        | -0.212        |
| VAT ASC # 2           | 200 000     | -0.005            | -0.070         | 0.255             | -0.258  | 0.674         | -0.048   | 0.929            | 0.350         | -0.162   | 0.007    | -21.472           | -0.033        | -2.878        | 0.202         | -0.152        | -0.806        | 35.348            | -0.857        | 0.018  | -0.212        | -0.105        | -0.033        | -0.079        | -0.173        | -0.547             | -0.911        | -0.004    | 0.035        | -0.053        | -0.142        | -0.475        |
| VAT ASC # 3           | 140 000     | 0.012             | -0.107         | 0.176             | -0.199  | 0.734         | -0.556   | 1.136            | 0.363         | -0.131   | 0.007    | -24.205           | 0.238         | -2.804        | 0.236         | -0.159        | -0.657        | 39.500            | -0.795        | 0.163  | -0.298        | -0.049        | -0.031        | -0.053        | -0.186        | -0.508             | -1.044        | 0.015     | 1.312        | -0.052        | -0.144        | -0.457        |
| VAT ASC # 4           | 260 000     | -0.003            | -0.102         | 0.135             | -0.281  | 0.732         | -0.153   | 0.965            | 0.312         | -0.047   | 0.008    | -22.156           | 0.142         | -2.816        | 0.207         | -0.137        | -0.800        | 33.138            | -0.846        | -0.255 | -0.087        | -0.138        | -0.035        | -0.067        | -0.184        | -0.457             | -1.051        | -0.035    | 1.320        | -0.042        | -0.165        | -0.572        |
| VAT ASC # 5           | 250 000     | 0.295             | -0.076         | 0.072             | 0.103   | 0.606         | -0.658   | 0.819            | 0.379         | -0.078   | 0.002    | -21.953           | 0.101         | -2.731        | 0.170         | -0.182        | -0.667        | 32.049            | -0.921        | -0.229 | -0.294        | -0.083        | -0.036        | -0.188        | -0.219        | -0.573             | -1.069        | -0.016    | 1.167        | -0.060        | -0.224        | -0.685        |
| VAT ASC # 6           | 290 000     | -0.008            | -0.017         | 0.173             | 0.105   | 0.921         | -0.272   | 0.870            | 0.406         | 0.048    | 0.007    | -19.306           | 0.232         | -2.743        | 0.316         | -0.123        | -0.562        | 35.286            | -0.838        | -0.142 | -0.075        | -0.079        | -0.031        | -0.049        | -0.180        | -0.472             | -1.059        | 0.028     | -0.035       | -0.043        | -0.085        | -0.650        |
| p value               | 0.9116      | 0.1223            | <b>0.0243</b>  | 0.278             | 0.7023  | <b>0.0400</b> | 0.7714   | <b>&lt;0.001</b> | <b>0.0468</b> | 0.4162   | 0.6145   | <b>&lt;0.0001</b> | <b>0.0041</b> | <b>0.0122</b> | <b>0.0201</b> | <b>0.0009</b> | <b>0.0005</b> | <b>&lt;0.0001</b> | <b>0.0386</b> | 0.2105 | <b>0.0161</b> | <b>0.0002</b> | <b>0.0107</b> | 0.0824        | <b>0.0151</b> | <b>&lt; 0.0001</b> | <b>0.0151</b> | 0.8206    | <b>0.011</b> | <b>0.0004</b> | <b>0.0257</b> | <b>0.0214</b> |
