# Supplementary material for: Metabolic Phenotyping of Adipose-Derived Stem Cells Reveals a Unique Signature and Intrinsic Differences between Fat Pads
Source: Stem Cells Int. 2019 May 14;2019:9323864. doi: 10.1155/2019/9323864 (PMC6541987; doi:10.1155/2019/9323864)
Supplement: Supplementary 3 — Table S2: concentrations of metabolites measured by 1H-NMR in S- and V-ASC supernatants after 24 h of culture at confluency with variable concentrations of glutamine and glucose in the conditions described in Figure 6. Metabolite concentrations in the medium placed in the same culture conditions but without cells have been deduced in the presented results. Data have not been normalized. The number of cells in each well is indicated. Statistics are from one-way ANOVA followed by multiple comparison Tukey's tests. Comparisons are done relatively to the control medium culture condition (25 mM glucose and 4 mM glutamine). p value ≤ 0.05 is considered significant; ns: not significant. [file 9323864.f3.pdf]

| S-ASC                                              |                    |             |                   |                      |                |         |         |          |         |         |          |         |           |           |         |           |            |         |         |        |            |           |               |               |          |        |           |           |          |        |       |
|----------------------------------------------------|--------------------|-------------|-------------------|----------------------|----------------|---------|---------|----------|---------|---------|----------|---------|-----------|-----------|---------|-----------|------------|---------|---------|--------|------------|-----------|---------------|---------------|----------|--------|-----------|-----------|----------|--------|-------|
| Medium culture composition                         | Sample             | Cell number | 2-Hydroxybutyrate | 2-Hydroxyisobutyrate | 2-Oxoglutarate | Acetate | Alanine | Arginine | Citrate | Formate | Fumarate | Glucose | Glutamate | Glutamine | Glycine | Histidine | Isoleucine | Lactate | Leucine | Lysine | Methionine | Ornithine | Phenylalanine | Pyroglutamate | Pyruvate | Serine | Succinate | Threonine | Tyrosine | Valine |       |
| Control medium:<br>25 mM glucose<br>4 mM glutamine | SAT ASC # 1        | 380 000     | -0.018            | -0.003               | -0.180         | 0.041   | 0.545   | -0.685   | 0.578   | 0.106   | 0.002    | -10.136 | 0.222     | -1.679    | 0.070   | -0.054    | -0.284     | 7.177   | -0.276  | -1.518 | -0.089     | 0.643     | -0.044        | -0.037        | 0.323    | -0.493 | -0.021    | -0.068    | -0.061   | -0.303 |       |
|                                                    | SAT ASC # 2        | 380 000     | -0.040            | 0.006                | -0.025         | 0.001   | 0.443   | -0.585   | 0.474   | 0.094   | 0.002    | -12.426 | 0.094     | -2.153    | -0.039  | -0.075    | -0.335     | 4.730   | -0.353  | -1.811 | -0.129     | 0.480     | -0.096        | 0.037         | 0.295    | -0.268 | -0.045    | -0.156    | -0.099   | -0.325 |       |
|                                                    | SAT ASC # 3        | 380 000     | -0.025            | -0.005               | -0.222         | -0.004  | 0.392   | -0.687   | 0.435   | 0.075   | 0.001    | -13.732 | 0.015     | -2.268    | -0.042  | -0.067    | -0.343     | 5.381   | -0.258  | -1.539 | -0.082     | 1.240     | -0.086        | 0.237         | 0.283    | -0.484 | -0.089    | -0.164    | -0.122   | -0.414 |       |
|                                                    |                    |             |                   |                      |                |         |         |          |         |         |          |         |           |           |         |           |            |         |         |        |            |           |               |               |          |        |           |           |          |        |       |
| Medium culture composition                         | Sample             | Cell number | 2-Hydroxybutyrate | 2-Hydroxyisobutyrate | 2-Oxoglutarate | Acetate | Alanine | Arginine | Citrate | Formate | Fumarate | Glucose | Glutamate | Glutamine | Glycine | Histidine | Isoleucine | Lactate | Leucine | Lysine | Methionine | Ornithine | Phenylalanine | Pyroglutamate | Pyruvate | Serine | Succinate | Threonine | Tyrosine | Valine |       |
| 25 mM glucose<br>0.5 mM glutamine                  | SAT ASC # 1        | 380 000     | -0.006            | 0.000                | -0.106         | 0.051   | 0.111   | -0.901   | 0.341   | 0.152   | 0.003    | -5.925  | -0.092    | -0.321    | 0.007   | -0.238    | 9.938      | -0.143  | 0.773   | -0.183 | 0.912      | -0.022    | 0.175         | 0.039         | -0.369   | -0.040 | -0.097    | 0.032     | -0.199   |        |       |
|                                                    | SAT ASC # 2        | 340 000     | -0.012            | 0.000                | -0.114         | 0.044   | 0.124   | -0.735   | 0.277   | 0.133   | 0.003    | -7.978  | -0.339    | -0.354    | 0.167   | -0.005    | -0.226     | 9.519   | -0.214  | 0.002  | -0.116     | 1.896     | 0.005         | 0.151         | 0.028    | -0.372 | 0.006     | 0.050     | 0.005    | -0.227 |       |
|                                                    | SAT ASC # 3        | 400 000     | -0.034            | 0.000                | -0.115         | -0.013  | 0.067   | -1.099   | 0.228   | 0.107   | 0.004    | -9.970  | -0.150    | -0.313    | 0.132   | -0.014    | -0.297     | 7.520   | -0.233  | -0.306 | -0.198     | 1.232     | -0.047        | -0.172        | 0.021    | -0.253 | -0.019    | -0.008    | -0.048   | -0.315 |       |
|                                                    | p value vs control | ns          | ns                | ns                   | ns             | <0.001  | ns      | <0.01    | ns      | <0.01   | ns       | <0.05   | <0.05     | <0.001    | <0.05   | <0.001    | ns         | <0.05   | <0.05   | ns     | p<0.01     | ns        | ns            | ns            | <0.001   | ns     | ns        | ns        | ns       | <0.05  | ns    |
| Medium culture composition                         | Sample             | Cell number | 2-Hydroxybutyrate | 2-Hydroxyisobutyrate | 2-Oxoglutarate | Acetate | Alanine | Arginine | Citrate | Formate | Fumarate | Glucose | Glutamate | Glutamine | Glycine | Histidine | Isoleucine | Lactate | Leucine | Lysine | Methionine | Ornithine | Phenylalanine | Pyroglutamate | Pyruvate | Serine | Succinate | Threonine | Tyrosine | Valine |       |
| 25 mM glucose<br>0 mM glutamine                    | SAT ASC # 1        | 400 000     | 0.000             | 0.000                | -0.003         | 0.029   | -0.211  | -0.439   | 0.084   | 0.119   | -0.002   | -1.071  | 0.016     | 0.043     | 0.111   | -0.013    | -0.316     | 10.251  | -0.206  | 0.017  | -0.132     | 1.417     | -0.009        | -0.003        | 0.000    | -0.234 | -0.011    | 0.121     | -0.020   | -0.224 |       |
|                                                    | SAT ASC # 2        | 180 000     | -0.004            | 0.000                | -0.014         | 0.198   | -0.242  | -0.515   | 0.069   | 0.121   | 0.000    | -8.196  | 0.063     | -0.072    | 0.155   | -0.028    | -0.359     | 9.247   | -0.242  | -0.702 | -0.129     | 0.753     | -0.099        | -0.020        | -0.004   | -0.112 | -0.021    | 0.040     | -0.010   | -0.268 |       |
|                                                    | SAT ASC # 3        | 210 000     | 0.021             | 0.000                | -0.012         | 0.206   | -0.246  | -0.770   | 0.118   | 0.144   | 0.000    | -8.020  | 0.163     | -0.032    | 0.274   | 0.000     | -0.292     | 12.571  | -0.129  | -0.966 | -0.150     | 1.124     | 0.022         | -0.017        | 0.006    | -0.344 | 0.008     | -0.023    | -0.004   | -0.202 |       |
|                                                    | p value vs control | ns          | <0.01             | ns                   | p<0.05         | p<0.001 | <0.001  | ns       | <0.001  | ns      | <0.01    | <0.05   | <0.001    | <0.05     | <0.01   | ns        | <0.05      | <0.01   | ns      | ns     | ns         | ns        | ns            | ns            | <0.001   | ns     | ns        | ns        | <0.05    | <0.05  | ns    |
| Medium culture composition                         | Sample             | Cell number | 2-Hydroxybutyrate | 2-Hydroxyisobutyrate | 2-Oxoglutarate | Acetate | Alanine | Arginine | Citrate | Formate | Fumarate | Glucose | Glutamate | Glutamine | Glycine | Histidine | Isoleucine | Lactate | Leucine | Lysine | Methionine | Ornithine | Phenylalanine | Pyroglutamate | Pyruvate | Serine | Succinate | Threonine | Tyrosine | Valine |       |
| 5 mM glucose<br>4 mM glutamine                     | SAT ASC # 1        | 350 000     | -0.004            | 0.000                | -0.147         | 0.042   | 0.601   | -0.325   | 0.529   | 0.132   | 0.004    | -4.719  | 0.176     | -1.592    | 0.182   | -0.020    | -0.173     | 4.578   | -0.232  | -0.574 | -0.053     | 0.059     | -0.116        | 0.000         | 0.274    | -0.573 | 0.000     | 0.132     | -0.022   | -0.112 |       |
|                                                    | SAT ASC # 2        | 280 000     | -0.009            | 0.000                | -0.155         | 0.026   | 0.579   | -0.850   | 0.532   | 0.118   | 0.004    | -4.857  | 0.176     | -1.650    | 0.130   | -0.035    | -0.173     | 3.916   | -0.229  | -1.267 | -0.125     | 0.294     | -0.114        | 0.000         | 0.223    | -0.535 | -0.001    | 0.046     | -0.028   | -0.150 |       |
|                                                    | SAT ASC # 3        | 340 000     | -0.004            | 0.000                | -0.135         | 0.076   | 0.757   | -0.487   | 0.694   | 0.177   | 0.004    | -4.799  | 0.318     | -1.505    | 0.279   | -0.026    | -0.173     | 5.899   | -0.135  | -0.041 | -0.078     | 0.000     | -0.075        | 0.000         | 0.314    | -0.207 | 0.044     | 0.159     | 0.031    | -0.041 |       |
|                                                    | p value vs control | ns          | ns                | ns                   | ns             | ns      | <0.05   | ns       | ns      | ns      | <0.05    | <0.001  | ns        | <0.05     | <0.001  | ns        | <0.05      | <0.01   | ns      | ns     | ns         | ns        | ns            | ns            | ns       | ns     | ns        | ns        | <0.05    | <0.01  | <0.05 |
| Medium culture composition                         | Sample             | Cell number | 2-Hydroxybutyrate | 2-Hydroxyisobutyrate | 2-Oxoglutarate | Acetate | Alanine | Arginine | Citrate | Formate | Fumarate | Glucose | Glutamate | Glutamine | Glycine | Histidine | Isoleucine | Lactate | Leucine | Lysine | Methionine | Ornithine | Phenylalanine | Pyroglutamate | Pyruvate | Serine | Succinate | Threonine | Tyrosine | Valine |       |
| 0 mM glucose<br>4 mM glutamine                     | SAT ASC # 1        | 170 000     | 0.002             | 0.000                | -0.172         | 0.026   | 0.356   | -0.995   | 0.322   | 0.094   | 0.002    | -0.570  | 0.184     | -1.736    | 0.028   | -0.024    | -0.264     | -1.272  | -0.229  | -0.402 | -0.030     | 0.029     | -0.043        | -0.181        | 0.089    | -0.213 | 0.001     | -0.174    | -0.059   | -0.214 |       |
|                                                    | SAT ASC # 2        | 120 000     | 0.003             | 0.000                | -0.143         | 0.007   | 0.334   | -1.646   | 0.282   | 0.106   | 0.002    | -0.550  | 0.128     | -1.707    | 0.109   | -0.048    | -0.264     | -1.195  | -0.205  | -0.561 | -0.062     | -0.235    | -0.026        | -0.181        | 0.095    | -0.532 | 0.009     | -0.089    | -0.048   | -0.109 |       |
|                                                    | SAT ASC # 3        | 270 000     | 0.008             | 0.000                | -0.115         | 0.004   | 0.423   | -0.539   | 0.347   | 0.113   | 0.003    | -0.543  | 0.103     | -1.707    | 0.130   | -0.024    | -0.264     | -1.149  | -0.217  | -0.381 | -0.025     | 0.059     | -0.067        | -0.079        | 0.089    | -0.532 | -0.005    | -0.065    | -0.044   | -0.156 |       |
|                                                    | p value vs control | <0.05       | <0.01             | ns                   | ns             | ns      | ns      | ns       | <0.05   | ns      | ns       | <0.001  | ns        | <0.001    | ns      | <0.05     | ns         | <0.001  | ns      | ns     | ns         | ns        | ns            | ns            | ns       | <0.001 | ns        | ns        | ns       | ns     | <0.05 |
| V-ASC                                              |                    |             |                   |                      |                |         |         |          |         |         |          |         |           |           |         |           |            |         |         |        |            |           |               |               |          |        |           |           |          |        |       |
| Medium culture composition                         | Sample             | Cell number | 2-Hydroxybutyrate | 2-Hydroxyisobutyrate | 2-Oxoglutarate | Acetate | Alanine | Arginine | Citrate | Formate | Fumarate | Glucose | Glutamate | Glutamine | Glycine | Histidine | Isoleucine | Lactate | Leucine | Lysine | Methionine | Ornithine | Phenylalanine | Pyroglutamate | Pyruvate | Serine | Succinate | Threonine | Tyrosine | Valine |       |
| Control medium:<br>25 mM glucose<br>4 mM glutamine | VAT ASC # 1        | 180 000     | 0.023             | -0.021               | -0.045         | 0.016   | 0.638   | -0.950   | 0.231   | 0.110   | 0.001    | -11.785 | 0.162     | -2.183    | -0.044  | -0.080    | -0.227     | 12.427  | -0.257  | -1.368 | -0.183     | 1.998     | -0.030        | 0.263         | 0.287    | -0.419 | -0.066    | -0.147    | -0.088   | -0.309 |       |
|                                                    | VAT ASC # 2        | 170 000     | -0.027            | -0.021               | -0.139         | 0.001   | 0.448   | -0.679   | 0.206   | 0.003   | 0.003    | -15.438 | 0.132     | -2.732    | -0.069  | -0.088    | -0.312     | 11.060  | -0.346  | -2.648 | -0.204     | 1.213     | -0.127        | -0.184        | 0.208    | -0.664 | -0.042    | -0.199    | -0.150   | -0.369 |       |
|                                                    | VAT ASC # 3        | 140 000     | 0.006             | -0.026               | -0.251         | 0.034   | 0.560   | -0.835   | 0.287   | 0.125   | 0.004    | -12.357 | 0.274     | -2.188    | 0.007   | -0.065    | -0.242     | 13.488  | -0.288  | -1.645 | -0.115     | 1.360     | -0.031        | -0.088        | 0.311    | -0.664 | 0.006     | -0.046    | -0.068   | -0.172 |       |
|                                                    |                    |             |                   |                      |                |         |         |          |         |         |          |         |           |           |         |           |            |         |         |        |            |           |               |               |          |        |           |           |          |        |       |
| Medium culture composition                         | Sample             | Cell number | 2-Hydroxybutyrate | 2-Hydroxyisobutyrate | 2-Oxoglutarate | Acetate | Alanine | Arginine | Citrate | Formate | Fumarate | Glucose | Glutamate | Glutamine | Glycine | Histidine | Isoleucine | Lactate | Leucine | Lysine | Methionine | Ornithine | Phenylalanine | Pyroglutamate | Pyruvate | Serine | Succinate | Threonine | Tyrosine | Valine |       |
| 25 mM glucose<br>0.5 mM glutamine                  | VAT ASC # 1        | 90 000      | -0.001            | 0.000                | -0.068         | 0.128   | -0.179  | -0.821   | 0.120   | 0.121   | 0.001    | -10.337 | 0.006     | -0.407    | 0.128   | -0.013    | -0.238     | 14.438  | -0.266  | -0.812 | -0.179     | 2.659     | -0.018        | 0.007         | 0.004    | -0.369 | -0.001    | -0.019    | -0.019   | -0.289 |       |
|                                                    | VAT ASC # 2        | 100 000     | -0.011            | 0.000                | -0.097         | 0.069   | -0.179  | -0.401   | 0.089   | 0.116   | 0.002    | -10.240 | 0.053     | -0.350    | 0.087   | -0.035    | -0.238     | 11.061  | -0.286  | -0.987 | -0.179     | 0.912     | -0.025        | 0.045         | 0.004    | -0.369 | -0.048    | -0.105    | -0.032   | -0.301 |       |
|                                                    | VAT ASC # 3        | 160 000     | -0.023            | 0.000                | -0.102         | 0.057   | -0.211  | -0.977   | 0.060   | 0.081   | 0.001    | -12.180 | -0.013    | -0.391    | -0.011  | -0.024    | -0.341     | 10.328  | -0.273  | -0.939 | -0.145     | 2.211     | -0.078        | -0.068        | 0.004    | -0.437 | -0.050    | -0.134    | -0.072   | -0.302 |       |
|                                                    | p value vs control | ns          | ns                | ns                   | ns             | ns      | <0.001  | ns       | <0.001  | ns      | ns       | ns      | ns        | <0.001    | ns      | <0.01     | ns         | ns      | ns      | ns     | ns         | ns        | ns            | ns            | ns       | <0.001 | ns        | ns        | ns       | <0.01  | ns    |
| Medium culture composition                         | Sample             | Cell number | 2-Hydroxybutyrate | 2-Hydroxyisobutyrate | 2-Oxoglutarate | Acetate | Alanine | Arginine | Citrate | Formate | Fumarate | Glucose | Glutamate | Glutamine | Glycine | Histidine | Isoleucine | Lactate | Leucine | Lysine | Methionine | Ornithine | Phenylalanine | Pyroglutamate | Pyruvate | Serine | Succinate | Threonine | Tyrosine | Valine |       |
| 25 mM glucose<br>0 mM glutamine                    | VAT ASC # 1        | 120 000     | 0.024             | 0.000                | -0.016         | 0.247   | -0.247  | -0.476   | 0.057   | 0.157   | 0.000    | -6.396  | 0.142     | 0.014     | 0.278   | -0.023    | -0.273     | 10.069  | -0.182  | -0.257 | -0.132     | 0.952     | -0.082        | 0.033         | -0.001   | -0.313 | -0.004    | 0.054     | 0.004    | -0.208 |       |
|                                                    | VAT ASC # 2        | 110 000     | 0.009             | 0.000                | -0.016         | 0.208   | -0.272  | -0.182   | 0.011   | 0.098   | -0.001   | -9.511  | 0.071     | 0.099     | 0.143   | -0.029    | -0.363     | 8.303   | -0.162  | -1.246 | -0.112     | 1.045     | -0.082        | 0.015         | -0.010   | -0.300 | -0.028    | -0.115    | -0.023   | -0.267 |       |
|                                                    | VAT ASC # 3        | 90 000      | 0.014             | 0.000                | -0.011         | 0.169   | -0.250  | -0.117   | 0.028   | 0.118   | 0.000    | -7.197  | -0.176    | -0.087    | 0.223   | -0.030    | -0.338     | 7.881   | -0.242  | -0.247 | -0.083     | 0.754     | 0.010         | 0.000         | -0.005   | -0.204 | -0.023    | -0.098    | 0.049    | -0.189 |       |
|                                                    | p value vs control | ns          | ns                | <0.001               | ns             | <0.001  | <0.001  | ns       | <0.001  | ns      | <0.01    | <0.01   | ns        | <0.001    | <0.01   | <0.01     | ns         | <0.05   | ns      | <0.05  | ns         | ns        | ns            | ns            | ns       | <0.001 | <0.01     | ns        | ns       | <0.01  | ns    |
| Medium culture composition                         | Sample             | Cell number | 2-Hydroxybutyrate | 2-Hydroxyisobutyrate | 2-Oxoglutarate | Acetate | Alanine | Arginine | Citrate | Formate | Fumarate | Glucose | Glutamate | Glutamine | Glycine | Histidine | Isoleucine | Lactate | Leucine | Lysine | Methionine | Ornithine | Phenylalanine | Pyroglutamate | Pyruvate | Serine |           |           |          |        |       |
